# Supplementary material for: Probing the Role of the Chloroplasts in Heavy Metal Tolerance and Accumulation in Euglena gracilis
Source: PubMed Central journal article supplement (PMC7023027; doi:10.3390/microorganisms8010115), 2020-01-14
Supplement: microorganisms-08-00115-s001.pdf [file microorganisms-08-00115-s001.pdf]

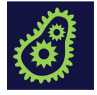

*Supplementary Material*

## Probing the role of the chloroplasts in heavy metal tolerance and accumulation in *Euglena gracilis*

**Bishal Khatiwada<sup>1,2</sup>, Mafruha T. Hasan<sup>1,2†</sup>, Angela Sun<sup>1,2</sup>, Karthik Shantharam Kamath<sup>1,2,3</sup>, Mehdi Mirzaei<sup>1,2,3</sup>, Anwar Sunna<sup>1,2\*</sup>, Helena Nevalainen<sup>1,2\*</sup>**

<sup>1</sup> Department of Molecular Sciences, Macquarie University, Sydney NSW 2109, Australia; bishal.khatiwada@hdr.mq.edu.au (B.K); angela.sun@mq.edu.au (A.S1)

<sup>2</sup> Biomolecular Discovery and Design Research Centre, Macquarie University, Sydney NSW 2109, Australia

<sup>3</sup> Australian Proteome Analysis Facility, Macquarie University, Sydney NSW 2109, Australia; karthik.kamath@mq.edu.au (K.K); mehdi.mirzaei@mq.edu.au (M.M)

<sup>†</sup> Current address: School of Life and Environmental Sciences, The University of Sydney NSW 2015, Australia; mafruha.hasan@sydney.edu.au (M.H)

<sup>\*</sup> Correspondence: anwar.sunna@mq.edu.au (A.S2); helena.nevalainen@mq.edu.au (H.N)

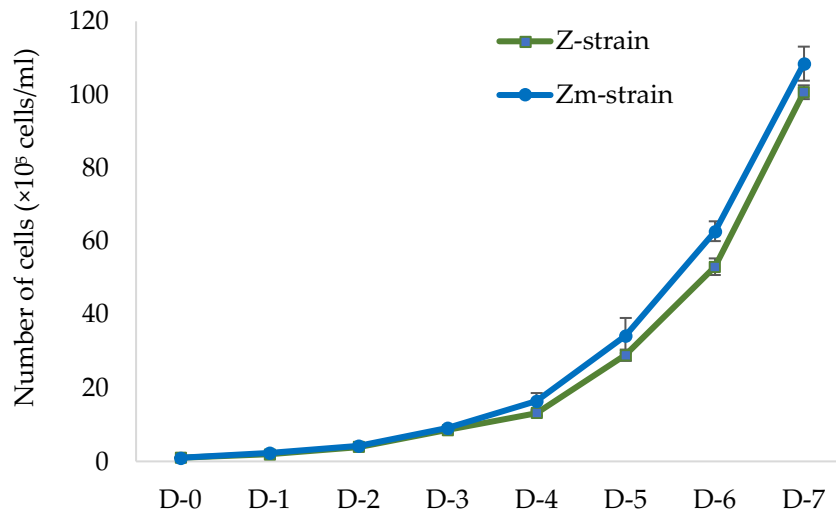

**Figure S1:** *E. gracilis* Z- and Zm- strains cultured in the GNY-medium only. Cells were collected each day until day 7. Error bars represent the standard deviation calculated from biological triplicates. The difference in the growth rate observed between the strains were not significantly different ( $p>0.05$ ).

**Table S1**

Common differentially abundant proteins in the *E. gracilis* Z- and Zm- strains treated with heavy metals Cd, Hg and Pb.

| 26 common proteins in Z and Zm strains treated with Cd |            |                                                              |
|--------------------------------------------------------|------------|--------------------------------------------------------------|
| Entry                                                  | UniProt ID | Description                                                  |
| dark_m.24827                                           | No hit     |                                                              |
| dark_m.32100                                           | A0A154R0T6 | Outer membrane lipoprotein Blc                               |
| dark_m.7057                                            | A0A2T4XYG7 | ATP-dependent RNA helicase RhlE                              |
| light_m.23993                                          | A0A0F0KWW7 | Phenylalanine--tRNA ligase beta subunit                      |
| dark_m.44646                                           | L8HA03     | Copper translocating P-type ATPase                           |
| light_m.75809                                          | A0A151XJ03 | Dynein heavy chain 1, axonemal                               |
| light_m.60828                                          | A0A0F0LAT1 | 2-dehydropantoate 2-reductase                                |
| light_m.12217                                          | A0A0F0LPX7 | Phenylacetaldehyde dehydrogenase                             |
| light_m.22749                                          | K4CML9     | No hit                                                       |
| light_m.54387                                          | A0A154QKU9 | Protoporphyrinogen oxidase                                   |
| light_m.16210                                          | H0ZWS8     | Uncharacterized protein                                      |
| dark_m.38833                                           | A0A0M2GYA5 | L-serine dehydratase TdcG                                    |
| dark_m.25698                                           | A0A154QZ68 | Chaperone protein DnaJ                                       |
| light_m.48058                                          | D6WFF2     | Mitochondrial inner membrane protease subunit 2-like Protein |
| light_m.82047                                          | No hit     |                                                              |
| light_m.30874                                          | No hit     |                                                              |
| dark_m.43765                                           | No hit     |                                                              |
| light_m.3606                                           | A0A1A0FMZ0 | Hybrid-cluster NAD(P)-dependent oxidoreductase               |
| light_m.38268                                          | No hit     |                                                              |

|               |            |                             |
|---------------|------------|-----------------------------|
| dark_m.25493  | No hit     |                             |
| light_m.7711  | No hit     |                             |
| light_m.77935 | C1MMP7     | Predicted protein           |
| dark_m.57478  | A0A1V9CKL2 | Acetoin utilization protein |
| dark_m.8469   | No hit     |                             |
| light_m.46821 | A0A202BFQ4 | 30S ribosomal protein S12   |
| light_m.89541 | No hit     |                             |

**4 common proteins in Z and Zm strains treated with Hg**

|               |            |                                         |
|---------------|------------|-----------------------------------------|
| light_m.55049 | No hit     |                                         |
| dark_m.67796  | A0A2T4Y663 | Molybdopterin biosynthesis protein MoeB |
| light_m.93651 | Q503L9     | Nucleoredoxin                           |
| dark_m.51731  | A0A2D1TGA4 | Peptidase C13                           |

**11 common proteins in Z and Zm strains treated with Hg**

|               |            |                                                 |
|---------------|------------|-------------------------------------------------|
| light_m.9201  | L2EL58     | Oxidoreductase FAD/NAD(P)-binding protein       |
| dark_m.25956  | A0A1S0X1C8 | Peptidase S8                                    |
| light_m.51226 | No hit     |                                                 |
| light_m.68502 | G0SGH7     | Protein transport protein SEC23                 |
| light_m.29375 | No hit     |                                                 |
| light_m.20070 | A0A154R099 | Oxidoreductase                                  |
| light_m.15802 | A7RFD0     | Predicted protein (Fragment)                    |
| light_m.36959 | A0A1E4IEZ5 | Uncharacterized protein                         |
| light_m.7711  | No hit     |                                                 |
| dark_m.3544   | A0A0F0LPD6 | Phosphoadenylyl-sulfate reductase (thioredoxin) |
| light_m.65853 | No hit     |                                                 |

---

**Table S2**

The high abundance proteins in *E. gracilis* Zm-strain during the exposure to the heavy metals Cd, Pb and Hg. Grey boxes designate the protein fold change below 1.5 during the heavy metal treatment as indicated.

| Entry         | Uniprot ID | Description                              | Fold Change |       |      |
|---------------|------------|------------------------------------------|-------------|-------|------|
|               |            |                                          | Cd          | Hg    | Pb   |
| dark_m.60521  |            | No hit                                   | 4.23        |       | 3.89 |
| light_m.51226 |            | No hit                                   | 3.31        |       | 2.99 |
| dark_m.3993   | A0A0F0L9B8 | 50S ribosomal protein L11                | 3.03        |       | 3.10 |
| dark_m.39672  |            | No hit                                   | 2.68        |       | 2.82 |
| dark_m.31849  | R7ZIW4     | Serine hydroxymethyltransferase          | 2.57        |       | 3.20 |
| dark_m.83071  | A0A1S0XIL6 | Thioesterase                             | 1.93        |       | 2.38 |
| light_m.39656 |            | No hit                                   | 12.38       | 7.02  |      |
| light_m.71680 | A0A202BAW4 | Peptidase S41                            | 4.79        | 12.58 |      |
| dark_m.47116  |            | No hit                                   | 4.22        | 3.73  |      |
| light_m.51217 |            | No hit                                   | 3.45        | 3.81  |      |
| dark_m.50948  | A0A0S4J6N6 | Presenilin                               | 3.10        | 3.53  |      |
| dark_m.25493  |            | No hit                                   | 2.93        | 4.89  |      |
| dark_m.48849  |            | No hit                                   | 2.91        | 2.48  |      |
| dark_m.1618   | A0A068RSE4 | Periplasmic binding protein              | 2.50        | 3.74  |      |
| light_m.17698 | P62152     | Calmodulin (CaM)                         | 2.06        | 1.73  |      |
| light_m.87494 | L8GPK4     | CPSF A subunit region protein            | 1.51        | 2.11  |      |
| light_m.39803 |            | No hit                                   |             | 6.89  | 5.17 |
| light_m.42333 | L2ENE5     | ATP-dependent zinc metalloprotease FtsH  |             | 6.85  | 5.08 |
| dark_m.86441  | A0A1Z1NM16 | RNA recognition motif-containing protein |             | 3.64  | 2.44 |
| light_m.53310 | F4Q134     | Uncharacterized protein                  |             | 3.27  | 2.33 |
| light_m.29375 |            | No hit                                   |             | 2.64  | 2.16 |
| dark_m.33344  | G4M004     | 5'-3' exoribonuclease                    |             | 2.38  | 1.78 |
| light_m.31954 | A0A2T4XWE1 | dTDP-glucose 4,6-dehydratase             |             | 1.63  | 1.54 |
| dark_m.97346  |            | No hit                                   | 5.26        |       |      |
| light_m.89541 |            | No hit                                   | 4.38        |       |      |
| light_m.46821 | A0A154QZD1 | 30S ribosomal protein S12                | 3.42        |       |      |
| light_m.60055 | B5YMG6     | Predicted protein                        | 3.08        |       |      |
| light_m.84117 |            | No hit                                   | 2.90        |       |      |
| light_m.86873 | H3GTH9     | Uncharacterized protein                  | 2.90        |       |      |
| light_m.17708 | D8R6L3     | Uncharacterized protein                  | 2.58        |       |      |
| dark_m.44646  | W2ZAX1     | Uncharacterized protein                  | 2.45        |       |      |
| dark_m.7647   |            | No hit                                   | 2.33        |       |      |
| light_m.91549 |            | No hit                                   | 2.23        |       |      |

|               |            |                                                    |      |
|---------------|------------|----------------------------------------------------|------|
| light_m.77479 |            | No hit                                             | 2.16 |
| dark_m.46264  |            | No hit                                             | 2.12 |
| dark_m.69962  | D0P1Q1     | UDP-sugar transporter, putative                    | 2.02 |
| light_m.42083 | M1FT22     | Multidrug resistance-associated protein member 4   | 1.96 |
| light_m.22749 | K4CML9     | Deleted.                                           | 1.95 |
| light_m.23642 | Q6IFS3     | Flp                                                | 1.89 |
| light_m.82047 |            | No hit                                             | 1.87 |
| light_m.95819 | U3JCF5     | Bromodomain adjacent to zinc finger domain 2A      | 1.85 |
| dark_m.99125  | F4Q9L9     | Uncharacterized protein                            | 1.79 |
| dark_m.24827  |            | No hit                                             | 1.79 |
| dark_m.7057   | A0A202BBA5 | ATP-dependent RNA helicase rhIE                    | 1.77 |
| light_m.75809 | L2EF85     | Putative bifunctional P-450:NADPH-P450 reductase 2 | 1.74 |
| dark_m.43765  |            | No hit                                             | 1.72 |
| light_m.16210 | V9G9Q8     | Cu+ P-type ATPase                                  | 1.72 |
| light_m.12217 | W7SD55     | Aldehyde dehydrogenase                             | 1.71 |
| light_m.17233 |            | No hit                                             | 1.67 |
| light_m.35949 | A8J8D7     | Predicted protein (Fragment)                       | 1.67 |
| light_m.22584 | L2EA73     | Translation initiation factor IF-2                 | 1.67 |
| light_m.45620 | A0A1A0FL38 | CDP-diacylglycerol-serine phosphatidyltransferase  | 1.67 |
| light_m.54112 | L2ELC0     | Short chain dehydrogenase                          | 1.64 |
| dark_m.51539  | A0A0P0YET1 | Adenylate kinase                                   | 1.61 |
| light_m.14317 | Q39720     | Cytoskeletal protein                               | 1.60 |
| light_m.74679 | Q4Q3D8     | Uncharacterized protein                            | 1.60 |
| dark_m.25698  | A0A0M2HFK0 | Quinone oxidoreductase 1                           | 1.60 |
| dark_m.35847  | A0A0F0LB15 | Dehydrosqualene desaturase                         | 1.60 |
| light_m.63375 | Q4CRR1     | Uncharacterized protein                            | 1.59 |
| light_m.40585 | Q63528     | Replication protein A 32 kDa subunit               | 1.59 |
| dark_m.32100  | A0A1A0EWG0 | Outer membrane lipoprotein Blc                     | 1.57 |
| dark_m.39978  |            | No hit                                             | 1.56 |
| light_m.30874 |            | No hit                                             | 1.55 |
| light_m.17174 |            | No hit                                             | 1.54 |
| light_m.60828 | A0A2D1TE80 | 2-dehydropantoate 2-reductase                      | 1.54 |
| light_m.54387 | A0A1V9CE30 | Protoporphyrinogen oxidase                         | 1.53 |
| light_m.61429 | A0A1A0F9J5 | Succinate-semialdehyde dehydrogenase               | 1.52 |
| light_m.39374 | A0A1J0F973 | Uncharacterized protein                            | 1.52 |
| light_m.9662  | Q9XIE2     | ABC transporter G family member 36                 | 1.52 |
| light_m.13400 | H0XLU1     | OVCA2, serine hydrolase domain containing          |      |

|               |            |                                                 |  |      |
|---------------|------------|-------------------------------------------------|--|------|
| light_m.51221 |            | No hit                                          |  | 3.70 |
| dark_m.25956  | A0A0F2CAY5 | Extracellular serine proteinase                 |  | 3.29 |
| dark_m.62831  | A0A1Z1NP99 | Peptide methionine sulfoxide reductase MsrA     |  | 3.25 |
| light_m.7720  | A0A202B5N3 | ABC transporter ATP-binding protein             |  | 3.09 |
| light_m.25133 | A0A1Z1NT65 | Maltose O-acetyltransferase                     |  | 2.74 |
| light_m.63754 |            | No hit                                          |  | 2.49 |
| dark_m.57478  | Q9BY41     | Histone deacetylase 8                           |  | 2.45 |
| dark_m.50981  | A0A1P8KGD3 | Zinc-type alcohol dehydrogenase-like protein    |  | 2.39 |
| light_m.69229 |            | No hit                                          |  | 2.31 |
| dark_m.3385   | A0A1S0XC77 | Transcriptional regulator                       |  | 2.28 |
| light_m.12682 | A0A2D1TMY0 | 2-deoxy-D-gluconate 3-dehydrogenase             |  | 2.15 |
| dark_m.31280  | A0A0F0LPK1 | 3-oxoacyl-[acyl-carrier-protein] reductase FabG |  | 2.05 |
| light_m.9201  | A0A1Z1NR96 | Hydroxylamine reductase                         |  | 2.00 |
| light_m.64279 |            | No hit                                          |  | 1.97 |
| light_m.11328 | A0A1Q5T7V2 | Acireductone dioxygenase                        |  | 1.94 |
| light_m.21908 | Q9XIE2     | ABC transporter G family member 36              |  | 1.93 |
| light_m.76103 | A0A154R5B6 | Molybdopterin biosynthesis protein MoeB         |  | 1.93 |
| light_m.57952 |            | No hit                                          |  | 1.90 |
| light_m.40489 | A0A1Q5SR65 | Ribonuclease Z                                  |  | 1.89 |
| light_m.14282 | A0A0L0HMK7 | Uncharacterized protein                         |  | 1.80 |
| light_m.45970 | C1MSD7     | Predicted protein                               |  | 1.78 |
| dark_m.48627  |            | No hit                                          |  | 1.78 |
| dark_m.79870  | R7Z8D8     | Zinc-type alcohol dehydrogenase-like protein    |  | 1.74 |
| dark_m.10999  | A0A1V9CNQ1 | HD domain-containing protein                    |  | 1.71 |
| dark_m.34625  | B5AEK8     | Calcium/calmodulin dependent protein kinase II  |  | 1.68 |
| dark_m.23482  | A0A1Z1NTE8 | HAD superfamily hydrolase                       |  | 1.66 |
| light_m.20245 | A0A0S4IUM5 | Uncharacterized protein                         |  | 1.65 |
| light_m.98107 | L2EAZ8     | Serine/threonine dehydratase)                   |  | 1.62 |
| light_m.55960 | L1JYJ7     | Uncharacterized protein                         |  | 1.58 |
| dark_m.74257  | R7ZKM2     | Peptidyl-tRNA hydrolase                         |  | 1.58 |
| dark_m.48875  | A0A067CP42 | Uncharacterized protein                         |  | 1.58 |
| dark_m.36033  | K0SFY3     | Uncharacterized protein                         |  | 1.56 |
| dark_m.16265  | A0A202B566 | Long-chain fatty acid--CoA ligase               |  | 1.55 |
| light_m.25045 | B7G487     | Predicted protein                               |  | 1.52 |
| light_m.50738 | A0A1A0FAG5 | Pyridoxine/pyridoxamine 5'-phosphate oxidase    |  | 1.52 |

|               |            |                                                  |       |
|---------------|------------|--------------------------------------------------|-------|
| dark_m.12291  | F1DB26     | Multidrug resistance-associated protein member 2 | 11.82 |
| light_m.27912 | A0A2D1TCX4 | ATP-dependent RNA helicase RhIE                  | 7.59  |
| light_m.83525 | M1D2I9     | Uncharacterized protein                          | 6.86  |
| light_m.57666 | A0A1A0FLF7 | Translation initiation factor IF-2               | 4.63  |
| light_m.90469 | A0A154QJD6 | Geranyl transferase                              | 4.50  |
| dark_m.31841  |            | No hit                                           | 3.67  |
| light_m.55049 |            | No hit                                           | 3.63  |
| light_m.66163 |            | No hit                                           | 2.85  |
| light_m.20056 | A0A0D0WHV6 | Unplaced genomic scaffold supercont1.2           | 2.71  |
| dark_m.31843  |            | No hit                                           | 2.54  |
| dark_m.78981  | W7RW48     | tRNA-dihydrouridine synthase                     | 2.51  |
| light_m.21403 | R1GGV2     | Putative nucleoside diphosphatase gda1 protein   | 2.41  |
| light_m.65698 | A0A1A0EW71 | Cold-shock protein                               | 2.34  |
| light_m.86875 |            | No hit                                           | 2.15  |
| dark_m.46118  | C1FFM3     | Uncharacterized protein                          | 2.08  |
| dark_m.21121  |            | No hit                                           | 2.08  |
| light_m.10258 | A0A2T4Y5S1 | Methionine synthase                              | 2.01  |
| light_m.81074 |            | No hit                                           | 1.97  |
| dark_m.45366  |            | No hit                                           | 1.95  |
| dark_m.61698  | L2EKM8     | Glutamate decarboxylase                          | 1.88  |
| dark_m.73618  | T0Q6C1     | Queuosine salvage protein                        | 1.86  |
| light_m.32958 |            | No hit                                           | 1.85  |
| light_m.3666  |            | No hit                                           | 1.81  |
| light_m.75862 | B9R9H9     | F-box and wd40 domain protein, putative          | 1.80  |
| dark_m.76890  | A0A067BR68 | Uncharacterized protein                          | 1.72  |
| dark_m.50364  | A0A2T4XUH8 | dTDP-4-amino-4,6-dideoxygalactose transaminase   | 1.70  |
| light_m.58392 | E0VMU1     | Uncharacterized protein                          | 1.68  |
| dark_m.27632  | C1EE51     | Uncharacterized protein                          | 1.67  |
| light_m.8430  |            | No hit                                           | 1.64  |
| dark_m.37836  |            | No hit                                           | 1.59  |
| dark_m.42805  | Q39758     | Actin                                            | 1.59  |
| light_m.61516 |            | No hit                                           | 1.58  |
| dark_m.58358  | C5WQ78     | Uncharacterized protein                          | 1.58  |
| dark_m.10344  | Q54DK4     | Alpha-protein kinase 1                           | 1.56  |
| dark_m.25768  | A0A1A0F1K4 | 3-oxoacyl-ACP reductase                          | 1.55  |
| light_m.36675 | A0A1Q5TAE8 | Phenylalanine--tRNA ligase alpha subunit         | 1.53  |
| light_m.31701 | R0EFS4     | Cytochrome P450                                  | 1.53  |

|               |            |                                              |      |
|---------------|------------|----------------------------------------------|------|
| light_m.93651 | Q503L9     | Nucleoredoxin                                | 1.52 |
| dark_m.67796  | A0A2T4Y663 | Molybdopterin biosynthesis protein MoeB      | 1.51 |
| dark_m.50276  | A0A0M2HNY1 | Glucose-6-phosphate 1-dehydrogenase          | 1.51 |
| light_m.19930 | A0A0F0M1E7 | 3-oxoacyl-[acyl-carrier-protein] synthase 2  | 1.51 |
| light_m.49430 | Q9STP8     | Acyl-CoA-binding domain-containing protein 2 | 1.50 |

### Supplementary Table S3

The high abundance metal binding proteins (FC > 1.5) in the *E. gracilis* Z- and Zm- strains treated with heavy metals.

| Entry           | Protein names                                               | Fold Change |
|-----------------|-------------------------------------------------------------|-------------|
| <b>Z-strain</b> |                                                             |             |
| A0A1V2LGX5      | Ribonuclease                                                | 30.26       |
| C3ZVA2          | Glutathione synthetase                                      | 14.05       |
| A0A1Q9F763      | Serine/threonine-protein phosphatase                        | 13.73       |
| G5CPN4          | Heat shock protein Dnaj4                                    | 11.09       |
| R0D071          | Rubredoxin                                                  | 9.02        |
| Q9AR22          | Magnesium-protoporphyrin IX                                 | 5.47        |
| A0A024UDI0      | Uncharacterized protein                                     | 5.37        |
| Q21029          | Mitogen-activated protein kinase kinase kinase              | 4.54        |
| Q17446          | Mitogen-activated protein kinase pmk-1                      | 4.28        |
| Q8GZR2          | Cytochrome f, chloroplastic                                 | 4.28        |
| A0A154R630      | ATP-dependent zinc metalloprotease FtsH                     | 3.81        |
| Q8H384          | Cadmium/zinc-transporting ATPase HMA3                       | 3.65        |
| A0A1F3CY04      | Copper-translocating P-type ATPase                          | 3.61        |
| L2EIC4          | Putative acetyl-CoA synthetase                              | 3.57        |
| A0A1Q9ECQ7      | Ankyrin repeat domain-containing protein 50                 | 3.55        |
| Q9STP8          | Acyl-CoA-binding domain-containing protein 2                | 3.51        |
| Q9XZE5          | Serine/threonine-protein phosphatase 2A catalytic subunit A | 3.45        |
| A0A067D6G0      | Uncharacterized protein                                     | 3.38        |
| A4J778          | Metal reductase                                             | 3.28        |
| W2ZAX1          | Uncharacterized protein                                     | 3.25        |
| A0A1Z1NML6      | Protease III                                                | 3.10        |
| B3G4H5          | Uncharacterized protein                                     | 3.04        |
| A0A212BY83      | ATP-dependent zinc metalloprotease FtsH                     | 3.03        |
| A0A1Z1NV89      | Beta-galactosidase                                          | 3.01        |
| A0A2T4XZA6      | Beta-galactosidase                                          | 3.00        |
| A0A1Q5SUR7      | N5-carboxyaminoimidazole ribonucleotide synthase            | 2.99        |
| R7ZFAQ8         | tRNA-2-methylthio-N(6)-dimethylallyladenine synthase        | 2.98        |



|            |                                                           |      |
|------------|-----------------------------------------------------------|------|
| G5EGQ3     | Serine/threonine-protein kinase max-2                     | 2.89 |
| L2EF85     | Putative bifunctional P-450:NADPH-P450 reductase 2        | 2.89 |
| A0A1E4SU43 | Uncharacterized protein                                   | 2.87 |
| A0A0Q0VXV3 | Aspartate--tRNA(Asp) ligase                               | 2.86 |
| A0A1A0FKE0 | Endonuclease V                                            | 2.83 |
| Q5RHR0     | Poly [ADP-ribose] polymerase (PARP)                       | 2.80 |
| A0A1Q5T4M5 | Inorganic pyrophosphatase                                 | 2.79 |
| A0A140AY28 | Sodium/potassium-transporting ATPase subunit alpha        | 2.73 |
| G0SGH7     | Protein transport protein SEC23                           | 2.69 |
| A0A0D1E225 | Uncharacterized protein                                   | 2.59 |
| A0A1Q5T1Q8 | Adenylate kinase (AK)                                     | 2.59 |
| A0A0F0LTK4 | Epi-isozizaene 5-monooxygenase                            | 2.57 |
| V9G9Q8     | Cu+ P-type ATPase                                         | 2.52 |
| A0A261XUE4 | Uncharacterized protein (Fragment)                        | 2.50 |
| A9LNK9     | 30-kDa cleavage and polyadenylation specificity factor 30 | 2.45 |
| A0A0W0B6R9 | Amidophosphoribosyltransferase (ATase)                    | 2.35 |
| L1JAG4     | Uncharacterized protein                                   | 2.30 |
| W7T5H8     | Phosphoglucomutase                                        | 2.30 |
| Q8WQG9     | Stress-activated protein kinase jnk-1                     | 2.30 |
| A0A0W0BAV8 | ATP-dependent zinc metalloprotease FtsH                   | 2.29 |
| S2JKQ5     | Uncharacterized protein                                   | 2.27 |
| Q869N2     | Serine/threonine-protein kinase pakB (dPAKb)              | 2.27 |
| A0A1R0MU78 | Chaperone protein DnaJ                                    | 2.25 |
| A0A0G4IX13 | Uncharacterized protein                                   | 2.23 |
| Q74FU6     | NADPH-Fe(3+) oxidoreductase subunit alpha                 | 2.23 |
| P11021     | Endoplasmic reticulum chaperone BiP                       | 2.22 |
| A0A1Z1NUH4 | Oligopeptidase A                                          | 2.21 |
| A0A154R4Z0 | Beta-phosphoglucomutase                                   | 2.16 |
| A0A1Q5TAE8 | Phenylalanine--tRNA ligase alpha subunit                  | 2.14 |
| A0A1V9YFI5 | Uncharacterized protein                                   | 2.11 |
| R0CY79     | Putative Zn-dependent peptidase                           | 2.10 |
| K1RJM8     | SAGA-associated factor 11 homolog                         | 2.06 |
| L2EMC1     | Cytochrome P450                                           | 2.03 |
| L2EN21     | 3-methyl-2-oxobutanoate hydroxymethyltransferase          | 1.99 |
| R0EMH0     | 1-deoxy-D-xylulose-5-phosphate synthase                   | 1.89 |
| Q8IMX7     | Mitochondrial Rho GTPase                                  | 1.89 |
| A4H998     | Putative zinc-finger protein ZPR1                         | 1.88 |
| Q21360     | MAP kinase-activated protein kinase mak-1                 | 1.88 |
| R0EPZ3     | ATP-dependent zinc metalloprotease                        | 1.87 |
| R0ERM1     | NADH-quinone oxidoreductase subunit I                     | 1.86 |
| L2ENE5     | ATP-dependent zinc metalloprotease FtsH                   | 1.84 |
| A0A1A0FMG5 | Amidophosphoribosyltransferase (ATase)                    | 1.83 |
| A0A0F8BD83 | Replication protein A subunit                             | 1.82 |

|            |                                         |      |
|------------|-----------------------------------------|------|
| L2ELE1     | NADH-quinone oxidoreductase subunit B   | 1.82 |
| A1AL80     | Rubrerythrin                            | 1.76 |
| A0A0W0B7C7 | Chaperone protein DnaJ                  | 1.66 |
| A0A061G729 | Calcium-binding EF-hand family protein  | 1.66 |
| A0A0Q0VNU4 | Flap endonuclease 1                     | 1.62 |
| A0A0F2CCA7 | Chaperone protein DnaJ                  | 1.62 |
| A0A0M2HRQ1 | ATP-dependent zinc metalloprotease FtsH | 1.60 |
| A0A0F2C6T0 | Aminodeoxyfutasine deaminase            | 1.60 |
| E0CT66     | Uncharacterized protein                 | 1.58 |
| L2EM15     | Phosphoenolpyruvate carboxykinase       | 1.57 |
| G7HXR1     | AraC-family transcriptional regulator   | 1.51 |
| A0A212BMG8 | 3-methylcrotonyl-CoA carboxylase        | 1.50 |
| A0A2P6TKR5 | Host cell factor 1                      | 3.01 |
| A0A0S4JP31 | Adenylosuccinate synthetase             | 1.76 |
| A0A0F2CAY5 | Extracellular serine proteinase         | 2.57 |
| A0A1Z1NNS6 | Phenylalanine-4-hydroxylase             | 2.26 |
| A0A1Z1NR96 | Hydroxylamine reductase                 | 2.90 |
| A0A0W0BA55 | Carbonic anhydrase                      | 2.05 |

---

#### **Zm-strain**

---

|            |                                                    |      |
|------------|----------------------------------------------------|------|
| A0A2R5GHD4 | Copper-transporting ATPase RAN1                    | 7.59 |
| L2ENE5     | ATP-dependent zinc metalloprotease                 | 5.08 |
| A0A0F2CAY5 | Extracellular serine proteinase                    | 3.29 |
| H3GTH9     | Uncharacterized protein                            | 2.90 |
| W2ZAX1     | Uncharacterized protein                            | 2.45 |
| Q9BY41     | Histone deacetylase 8                              | 2.45 |
| A0A1P8KGD3 | Zinc-type alcohol dehydrogenase-like protein       | 2.39 |
| C1FFM3     | Uncharacterized protein                            | 2.08 |
| P62152     | Calmodulin (CaM)                                   | 2.06 |
| A0A2T4Y5S1 | Methionine synthase                                | 2.01 |
| A0A1Z1NR96 | Hydroxylamine reductase                            | 2.00 |
| A0A1Q5T7V2 | Acireductone dioxygenase                           | 1.94 |
| A0A1Q5SR65 | Ribonuclease Z (RNase Z)                           | 1.89 |
| U3JCF5     | Bromodomain adjacent to zinc finger domain 2A      | 1.85 |
| B9R9H9     | F-box and wd40 domain protein, putative            | 1.80 |
| R7Z8D8     | Zinc-type alcohol dehydrogenase-like protein       | 1.74 |
| L2EF85     | Putative bifunctional P-450:NADPH-P450 reductase 2 | 1.74 |
| V9G9Q8     | Cu+ P-type ATPase                                  | 1.72 |
| Q54DK4     | Alpha-protein kinase 1                             | 1.56 |
| A0A1Q5TAE8 | Phenylalanine--tRNA ligase alpha subunit           | 1.53 |
| R0EFS4     | Cytochrome P450                                    | 1.53 |
| Q9STP8     | Acyl-CoA-binding domain-containing protein 2       | 1.50 |

---
